# Supplementary material for: Clinical and Histological Characteristics of Localized Morphea, Generalized Morphea and Systemic Sclerosis: A Comparative Study Aided by Machine Learning
Source: PubMed Central journal article supplement — Acta Derm Venereol. 2023 Sep 20;103:11953. doi: 10.2340/actadv.v103.11953 (PMC10522325; doi:10.2340/actadv.v103.11953), 2023-09-20
Supplement: ActaDV-103-11953-s2.pdf [file ActaDV-103-11953-s2.pdf]

Supplementary material has been published as submitted. It has not been copyedited, typeset or checked for scientific content by Acta Dermato-Venereologica

**Fig. S1. Two-Dimensional visualization image of resampled data using the SMOTE-Tomek links method.** LM, localized morphea; GM, generalized morphea; SSc, systemic sclerosis.

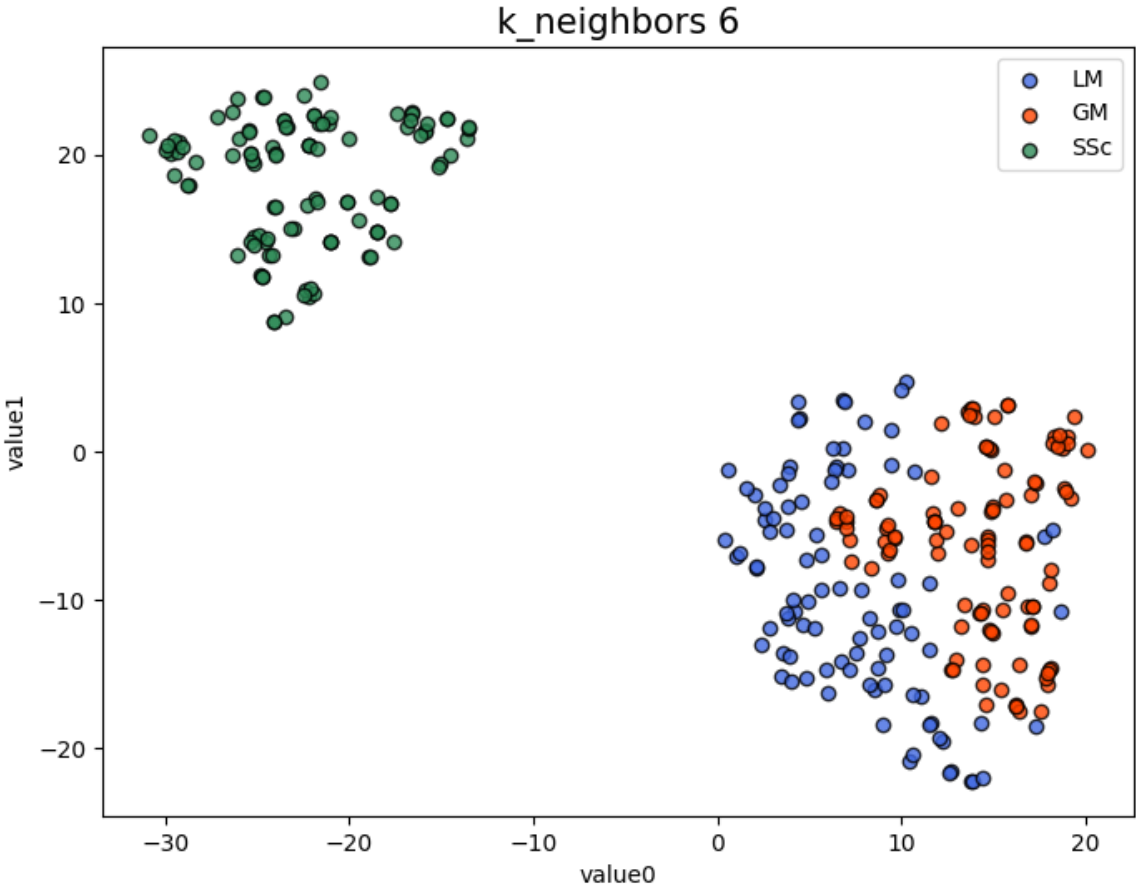

**Fig. S2. Confusion matrix for LM, GM, and SSc classifications in the random forest model.** LM, localized morphea; GM, generalized morphea; SSc, systemic sclerosis.

**Confusion Matrix**

|                        |                   |                      |                       |                     |                       |
|------------------------|-------------------|----------------------|-----------------------|---------------------|-----------------------|
| <b>Predicted label</b> | LM                | <b>44</b><br>80.0%   | <b>3</b><br>5.5%      | <b>0</b><br>0.0%    | <b>93.6%</b><br>6.4%  |
|                        | GM                | <b>2</b><br>3.6%     | <b>1</b><br>1.8%      | <b>0</b><br>0.0%    | <b>33.3%</b><br>66.7% |
|                        | SSc               | <b>0</b><br>0.0%     | <b>0</b><br>0.0%      | <b>5</b><br>9.1%    | <b>100%</b><br>0.0%   |
|                        |                   | <b>95.7%</b><br>4.3% | <b>25.0%</b><br>75.0% | <b>100%</b><br>0.0% | <b>90.9%</b><br>9.1%  |
|                        | LM                | GM                   | SSc                   |                     |                       |
|                        | <b>True label</b> |                      |                       |                     |                       |
