# Supplementary material for: Clinical and Histological Characteristics of Localized Morphea, Generalized Morphea and Systemic Sclerosis: A Comparative Study Aided by Machine Learning
Source: PubMed Central journal article supplement — Acta Derm Venereol. 2023 Sep 20;103:11953. doi: 10.2340/actadv.v103.11953 (PMC10522325; doi:10.2340/actadv.v103.11953), 2023-09-20
Supplement: ActaDV-103-11953-s3.pdf [file ActaDV-103-11953-s3.pdf]

Supplementary material has been published as submitted. It has not been copyedited, typeset or checked for scientific content by *Acta Dermato-Venereologica*

**Table SI.** Criteria for the histologic grade of sclerosis

|          |                                                                                                                                                                                                                                                                                                                                                              |
|----------|--------------------------------------------------------------------------------------------------------------------------------------------------------------------------------------------------------------------------------------------------------------------------------------------------------------------------------------------------------------|
| Mild     | Presence of no fibrosis in the papillary dermis and light fibrosis in the superficial reticular dermis or in the median reticular dermis or in the deep reticular dermis;                                                                                                                                                                                    |
| Moderate | All cases that did not belong to mild or severe                                                                                                                                                                                                                                                                                                              |
| Severe   | Presence of severe fibrosis in the deep reticular dermis and in the median reticular dermis irrespective of the degree in the superficial reticular dermis and in the papillary dermis<br>or<br>Severe fibrosis in the deep reticular dermis plus moderate fibrosis in the median and in the superficial reticular dermis as well as in the papillary dermis |

**Table SII.** Definition for the patterns of sclerosis

|                |                                                                                                                                             |
|----------------|---------------------------------------------------------------------------------------------------------------------------------------------|
| Top heavy      | Thickened collagen bundles exclusively in the papillary dermis to the superficial reticular dermis.                                         |
| Bottom heavy   | Thickened collagen bundles in the deep reticular dermis and subcutis, and sparing from the papillary dermis to the median reticular dermis. |
| Full thickness | Thickened collagen bundles throughout the full dermis.                                                                                      |

**Table III. ACR-EULAR criteria for SSc patients (n=15)**

|                                                                                                                                               |                                                                       |       | 1         | 2         | 3         | 4         | 5         | 6         | 7         | 8         | 9         | 10        | 11       | 12        | 13        | 14       | 15       |
|-----------------------------------------------------------------------------------------------------------------------------------------------|-----------------------------------------------------------------------|-------|-----------|-----------|-----------|-----------|-----------|-----------|-----------|-----------|-----------|-----------|----------|-----------|-----------|----------|----------|
|                                                                                                                                               |                                                                       |       | F/78      | F/53      | M/58      | M/30      | F/53      | F/38      | F/75      | F/70      | F/61      | M/52      | F/47     | F/34      | F/42      | F/46     | F/66     |
| Items                                                                                                                                         | Sub-items                                                             | score |           |           |           |           |           |           |           |           |           |           |          |           |           |          |          |
| Skin thickening of the fingers of both hands extending proximal to the metacarpophalangeal joints (sufficient criterion)                      |                                                                       | 9     | 0         | 0         | <b>9</b>  | 0         | <b>9</b>  | 0         | 0         | <b>9</b>  | <b>9</b>  | 0         | 0        | 0         | 0         | 0        | 0        |
| Skin thickening of the fingers (only count the highest score)                                                                                 | Puffy fingers                                                         | 2     | 2         | 2         | 2         | 0         | <b>2</b>  | 0         | <b>2</b>  | <b>2</b>  | 0         | 2         | 0        | 0         | <b>2</b>  | 0        | <b>2</b> |
|                                                                                                                                               | Sclerodactyly of the fingers (distal to MCP but proximal to the PIPs) | 4     | <b>4</b>  | <b>4</b>  | <b>4</b>  | <b>4</b>  | 0         | <b>4</b>  | 0         | 0         | <b>4</b>  | <b>4</b>  | 0        | <b>4</b>  | 0         | 0        | 0        |
| Finger tip lesions (only count the highest score)                                                                                             | Digital Tip Ulcers                                                    | 2     | 0         | <b>2</b>  | 0         | 0         | 0         | 0         | 0         | <b>2</b>  | 0         | 0         | 0        | 0         | 0         | 0        | 0        |
|                                                                                                                                               | Finger Tip Pitting Scars                                              | 3     | 0         | 0         | 0         | 0         | 0         | 0         | 0         | 0         | 0         | 0         | 0        | 0         | 0         | 0        | 0        |
| Telangiectasia                                                                                                                                |                                                                       | 2     | <b>2</b>  | 0         | 0         | <b>2</b>  | <b>2</b>  | <b>2</b>  | <b>2</b>  | 0         | <b>2</b>  | <b>2</b>  | 0        | <b>2</b>  | <b>2</b>  | <b>2</b> | <b>2</b> |
| Abnormal nailfold capillaries                                                                                                                 |                                                                       | 2     | <b>2</b>  | 0         | 0         | <b>2</b>  | <b>2</b>  | <b>2</b>  | <b>2</b>  | 0         | <b>2</b>  | <b>2</b>  | 0        | <b>2</b>  | <b>2</b>  | <b>2</b> | <b>2</b> |
| Pulmonary arterial hypertension and/or Interstitial lung Disease* (*Maximum score is 2)                                                       | PAH<br>ILD                                                            | 2     | 0         | <b>2</b>  | <b>2</b>  | 0         | <b>2</b>  | 0         | <b>2</b>  | 0         | <b>2</b>  | <b>2</b>  | 0        | <b>2</b>  | <b>2</b>  | <b>2</b> | 0        |
| Raynaud's phenomenon                                                                                                                          |                                                                       | 3     | <b>3</b>  | <b>3</b> | 0         | <b>3</b>  | <b>3</b> | <b>3</b> |
| Scleroderma related antibodies** (any of anti-centromere, anti-topoisomerase I (anti-Scl 70), anti-RNA polymerase III) (**Maximum score is 3) | anti-centromere<br>anti-topoisomerase I<br>anti-RNA polymerase III    | 3     | <b>3</b>  | <b>3</b>  | 0         | 0         | 0         | <b>3</b>  | 0         | <b>3</b>  | <b>3</b>  | 0         | <b>3</b> | <b>3</b>  | 0         | 0        | 0        |
| <b>Sum</b>                                                                                                                                    |                                                                       |       | <b>14</b> | <b>14</b> | <b>18</b> | <b>11</b> | <b>11</b> | <b>14</b> | <b>11</b> | <b>19</b> | <b>25</b> | <b>13</b> | <b>6</b> | <b>13</b> | <b>11</b> | <b>9</b> | <b>9</b> |

Only numbers in bold were included in the score.

**Table SIV.** Summary of patient characteristics and clinical findings between the localized morphea, generalized morphea, and systemic sclerosis groups

|                                                                | LM (n=150)                                                     | GM (n=16)                                        | SSc (n=15)                                                  | P-value          |
|----------------------------------------------------------------|----------------------------------------------------------------|--------------------------------------------------|-------------------------------------------------------------|------------------|
|                                                                | N (%)                                                          | N (%)                                            | N (%)                                                       | Overall          |
| Female sex                                                     | 124 (82.7)                                                     | 13 (81.3)                                        | 12 (80.0)                                                   | 0.930            |
| Age at diagnosis, y (median, IQR)                              | 33.5 (20.0–49.8)                                               | 27.5 (21.0–61.0)                                 | 53.0 (42.0–66.0)                                            | <b>0.004</b>     |
| Duration of symptoms, m (median, IQR)                          | 15.0 (6.0–45.0)                                                | 30.0 (8.3–75.0)                                  | 35.0 (6.0–86.0)                                             | 0.323            |
| Subtype                                                        | Circumscribed: 80 (53.3)<br>Linear: 66 (40)<br>Mixed: 4 (2.67) | Generalized: 13 (81.3)<br>Pansclerotic: 3 (18.7) | Limited: 5 (33.3)<br>Diffuse: 5 (33.3)<br>Overlap: 5 (33.3) | -                |
| <b>Anatomical location<sup>a</sup></b>                         |                                                                |                                                  |                                                             |                  |
| Scalp                                                          | 15 (10.0)                                                      | 1 (6.3)                                          | 0 (0.0)                                                     | 0.667            |
| Forehead (En coup de sabre)                                    | 23 (15.3)                                                      | 1 (6.3)                                          | 0 (0.0)                                                     | 0.212            |
| Face and neck                                                  | 27 (18.0)                                                      | 1 (6.3)                                          | 4 (26.7)                                                    | 0.337            |
| Trunk                                                          | 61 (40.7)                                                      | <b>15 (93.8)</b>                                 | 6 (40)                                                      | <b>&lt;0.001</b> |
| Upper extremities                                              | 24 (16.0)                                                      | <b>11 (68.8)</b>                                 | <b>12 (80.0)</b>                                            | <b>&lt;0.001</b> |
| Lower extremities                                              | 31 (20.7)                                                      | <b>14 (87.5)</b>                                 | 7 (46.7)                                                    | <b>&lt;0.001</b> |
| Hands or feet                                                  | 2 (1.3)                                                        | <b>6 (37.5)</b>                                  | <b>8 (53.3)</b>                                             | <b>&lt;0.001</b> |
| Blaschkoid distribution                                        | 20 (13.3)                                                      | 2 (12.5)                                         | 1 (6.7)                                                     | 0.908            |
| <b>Functional limitations or clinical symptoms<sup>a</sup></b> |                                                                |                                                  |                                                             |                  |
| Pain or arthralgia of affected joints                          | 13 (8.7)                                                       | 5 (31.3)                                         | <b>10 (66.7)</b>                                            | <b>&lt;0.001</b> |
| Pruritus                                                       | 18 (12.0)                                                      | 4 (25.0)                                         | <b>6 (40.0)</b>                                             | <b>0.010</b>     |
| Joint contracture or decreased ROM                             | 3 (2.0)                                                        | <b>4 (25.0)</b>                                  | <b>5 (33.3)</b>                                             | <b>&lt;0.001</b> |
| Sclerodactyly                                                  | 0 (0.0)                                                        | 1 (6.3)                                          | <b>8 (53.3)</b>                                             | <b>&lt;0.001</b> |
| Raynaud phenomenon                                             | 0 (0.0)                                                        | 0 (0.0)                                          | <b>14 (93.3)</b>                                            | <b>&lt;0.001</b> |
| <b>History of autoimmune disease</b>                           |                                                                |                                                  |                                                             |                  |
|                                                                | 20 (13.3)                                                      | 4 (25.0)                                         | <b>9 (60.0)</b>                                             | <b>&lt;0.001</b> |
| <b>Non-cutaneous manifestation<sup>b</sup></b>                 |                                                                |                                                  |                                                             |                  |
| Musculoskeletal                                                | 8 (5.3)                                                        | 4 (25.0)                                         | <b>15 (100.0)</b>                                           | <b>&lt;0.001</b> |
| CNS                                                            | 0 (0.0)                                                        | 0 (0.0)                                          | 0 (0.0)                                                     | >0.99            |
| GI                                                             | 0 (0.0)                                                        | 0 (0.0)                                          | <b>7 (46.7)</b>                                             | <b>&lt;0.001</b> |
| Pulmonary                                                      | 0 (0.0)                                                        | 0 (0.0)                                          | <b>9 (60.0)</b>                                             | <b>&lt;0.001</b> |
| <b>Laboratory finding</b>                                      |                                                                |                                                  |                                                             |                  |
| ≥1 abnormal laboratory value                                   | 41/128 (32.0)                                                  | <b>13/16 (81.3)</b>                              | <b>15/15 (100)</b>                                          | <b>&lt;0.001</b> |

|                                                   |               |                     |                     |                  |
|---------------------------------------------------|---------------|---------------------|---------------------|------------------|
| ANA level $\geq$ 1:80                             | 22/123 (17.9) | <b>12/16 (75.0)</b> | <b>13/15 (86.7)</b> | <b>&lt;0.001</b> |
| Peripheral eosinophilia<br>( $>500/\mu\text{L}$ ) | 5/124 (4.0)   | <b>4/16 (25.0)</b>  | <b>4/15 (26.7)</b>  | <b>0.001</b>     |
| Elevated ESR or CRP level                         | 17/60 (28.3)  | 3/14 (21.4)         | <b>13/15 (86.7)</b> | <b>&lt;0.001</b> |
| Rheumatoid factor                                 | 6/44 (13.6)   | 2/9 (22.2)          | 5/15 (33.3)         | 0.173            |
| Anti-Scl-70 Ab                                    | 0/76 (0.0)    | 0/14 (0.0)          | <b>4/15 (26.7)</b>  | <b>&lt;0.001</b> |
| Anti-centromere Ab                                | 0/46 (0.0)    | 2/10 (20.0)         | 3/15 (20.0)         | <b>0.005</b>     |

<sup>a</sup>Patients might be listed in  $>1$  category

<sup>b</sup>Musculoskeletal: Arthralgia or decrease of range of motion. Pulmonary: ILD or pulmonary hypertension, GI: GERD or achalasia

LM: localized morphea; GM: generalized morphea; SSc: systemic sclerosis; IQR: interquartile range; ANA: antinuclear antibody; ESR: erythrocyte sedimentation rate; CRP: C-reactive protein; Scl-70: scleroderma-70; Ab: antibody; CNS: central nervous system; GI: gastrointestinal; RO: range of motion.

Bold cells show significant adjusted standardized residuals ( $>2.1$ ) or  $P<0.05$ .

**Table SV.** Comparison of histopathological features between the localized morphea, generalized morphea, and systemic sclerosis groups

|                                          | LM (n=150)       | GM (n=16)        | SSc (n=15)        | P-value          |
|------------------------------------------|------------------|------------------|-------------------|------------------|
|                                          | N (%)            | N (%)            | N (%)             | Overall          |
| <b>Pattern of sclerosis</b>              |                  |                  |                   |                  |
| Top heavy                                | 36 (24.0)        | 3 (18.8)         | 1 (6.7)           | 0.354            |
| Bottom heavy                             | 63 (42.0)        | 7 (43.8)         | 9 (60.0)          | 0.407            |
| Full thickness                           | 51 (34.0)        | 6 (37.5)         | 5 (33.3)          | 0.958            |
| <b>Degree of sclerosis</b>               |                  |                  |                   |                  |
| Mild                                     | <b>44 (29.3)</b> | 3 (18.8)         | 0 (0.0)           | <b>0.024</b>     |
| Moderate                                 | 73 (48.7)        | 5 (31.3)         | 6 (40.0)          | 0.362            |
| Severe                                   | 33 (22.0)        | 8 (50.0)         | <b>9 (60.0)</b>   | <b>0.001</b>     |
| <b>DSQ or fat sclerosis</b>              | 70 (46.7)        | 12 (75.0)        | <b>15 (100.0)</b> | <b>&lt;0.001</b> |
| <b>Degree of inflammation</b>            |                  |                  |                   |                  |
| None to mild                             | 78 (52.0)        | 5 (31.3)         | 10 (66.7)         | 0.134            |
| Moderate                                 | 55 (36.7)        | 7 (43.8)         | 5 (33.3)          | 0.816            |
| Severe                                   | 17 (11.3)        | 4 (25.0)         | 0 (0.0)           | 0.087            |
| <b>DSQ or fat inflammation</b>           | 32 (21.3)        | <b>7 (43.8)</b>  | 1 (6.7)           | <b>0.046</b>     |
| <b>Specific cell type present</b>        |                  |                  |                   |                  |
| Plasma cells                             | 81 (54.0)        | <b>14 (87.5)</b> | 10 (66.7)         | <b>0.028</b>     |
| Eosinophils                              | 17 (11.3)        | 4 (25.0)         | 4 (26.7)          | 0.07             |
| <b>Pigmentation</b>                      |                  |                  |                   |                  |
| Basal pigmentation                       | 70 (46.7)        | 11 (68.8)        | 10 (66.7)         | 0.101            |
| Melanin incontinence                     | 31 (20.7)        | <b>8 (50.0)</b>  | <b>9 (60.0)</b>   | <b>&lt;0.001</b> |
| None                                     | <b>64 (42.7)</b> | 3 (18.8)         | 1 (6.7)           | <b>0.006</b>     |
| <b>Presence of epidermal atrophy</b>     | 59 (39.3)        | 5 (31.3)         | 4 (26.7)          | 0.540            |
| <b>Presence of dermal telangiectasia</b> | 47 (31.3)        | 3 (18.8)         | 7 (46.7)          | 0.246            |

LM: localized morphea; GM: generalized morphea; SSc: systemic sclerosis; DSQ: dermosubcutaneous fat junction.

Bold cells show significant adjusted standardized residuals (>2.1) or P<0.05.
